# Supplementary material for: The Genetic Causal Association between Educational Attainment and Risk of 12 Common Musculoskeletal Disorders: A Two‐Sample Mendelian Randomization
Source: PubMed Central journal article supplement — Orthop Surg. 2023 Sep 7;15(11):2814–21. doi: 10.1111/os.13821 (PMC10622299; doi:10.1111/os.13821), 2023-09-07
Supplement: OS-15-2814-s001.pdf [file OS-15-2814-s001.pdf]

A

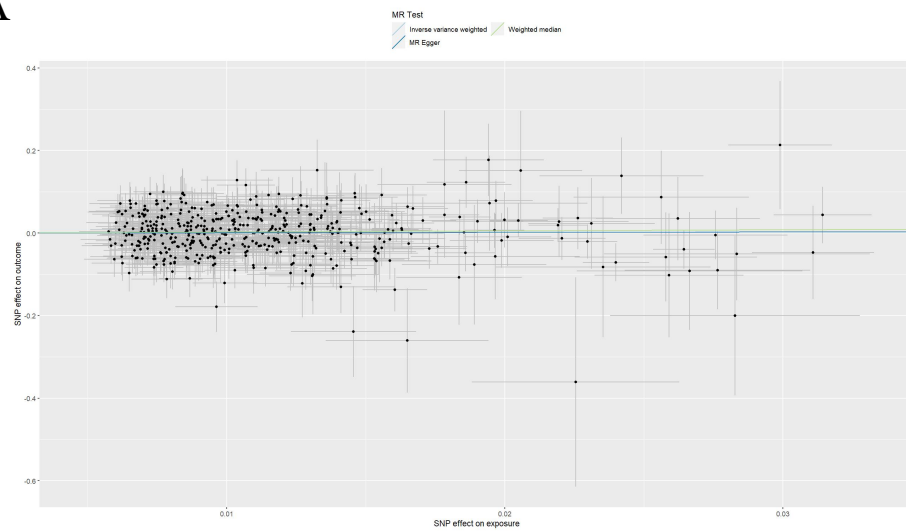

B

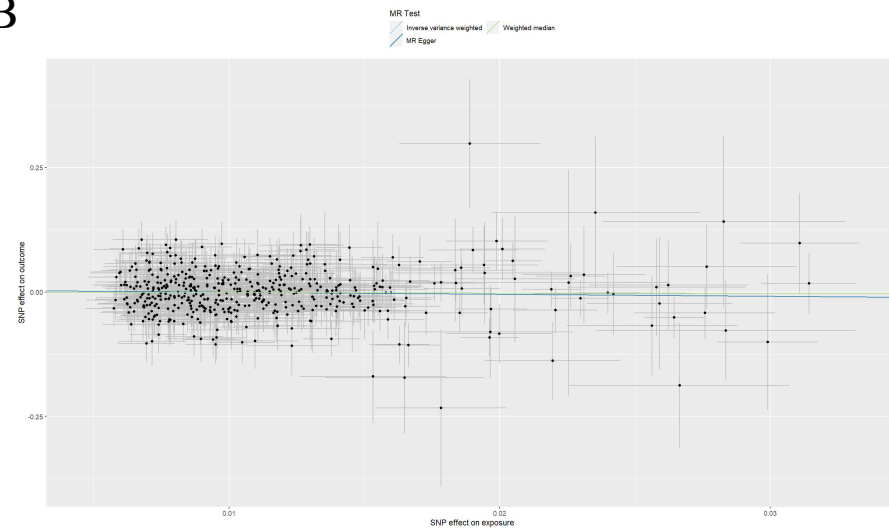

C

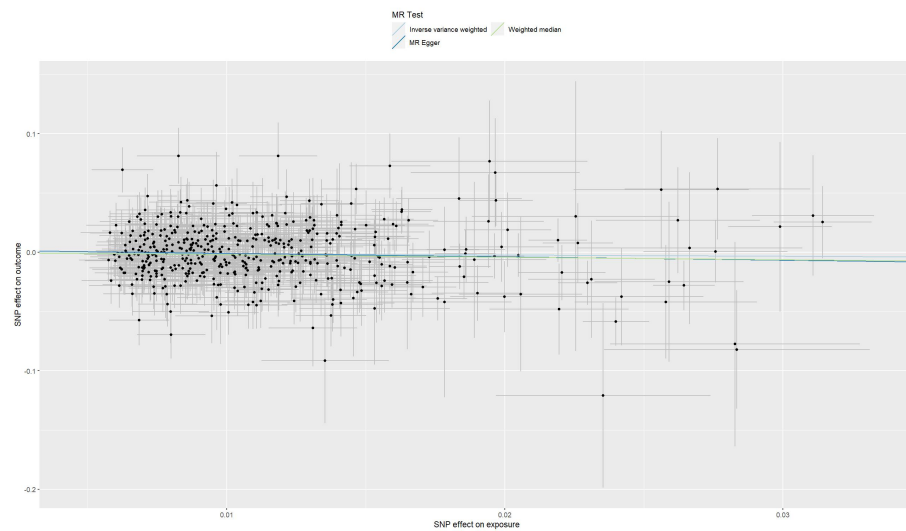

D

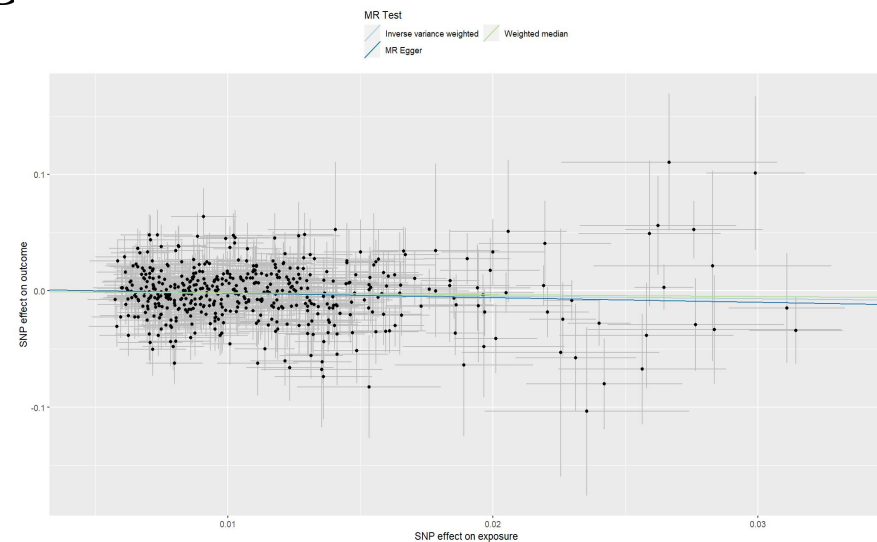

Figure S1. The scatter plot of SNPs associated with education attainment and their risk of musculoskeletal system diseases. A. Osteonecrosis B. Osteomyelitis C. Osteoporosis D. Gout

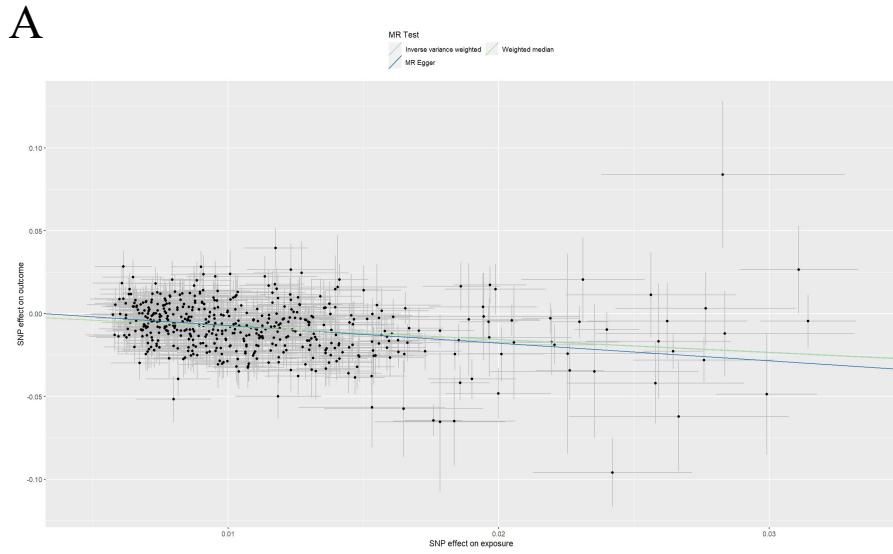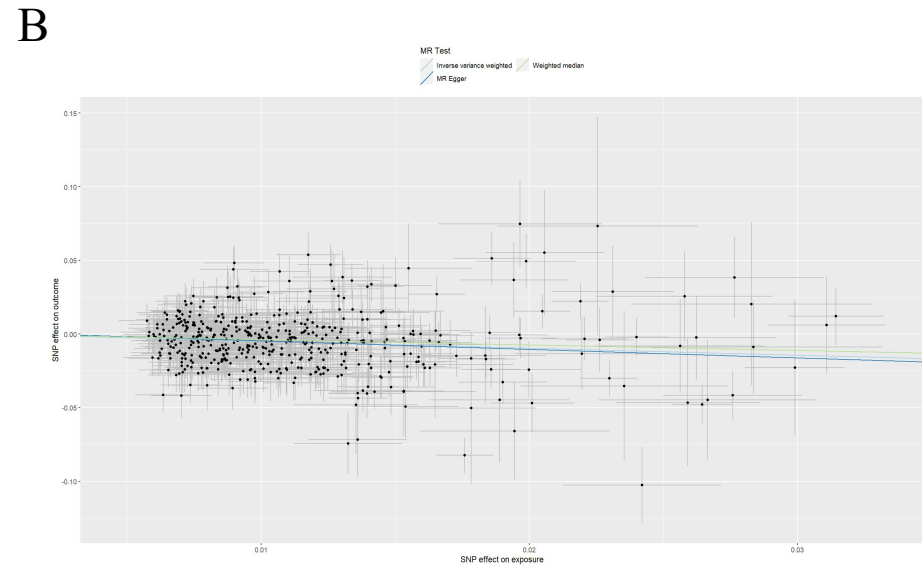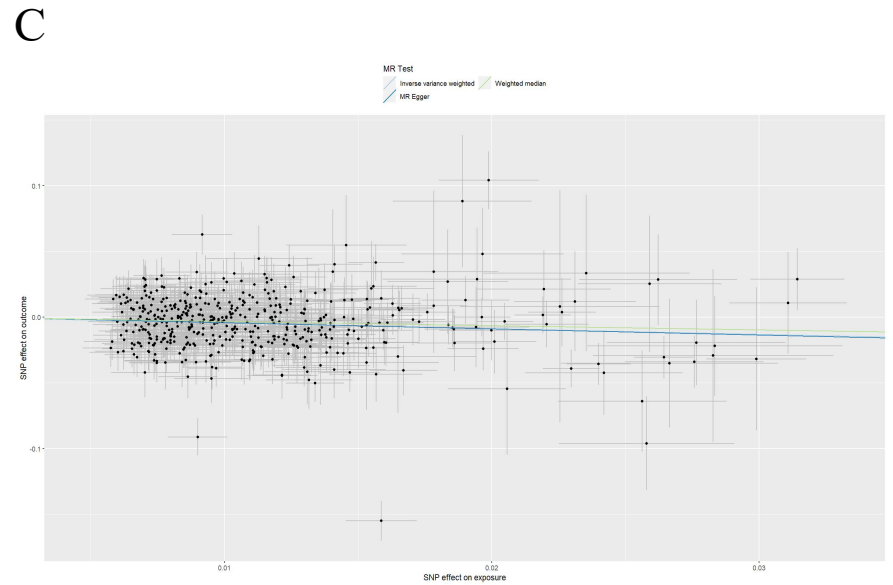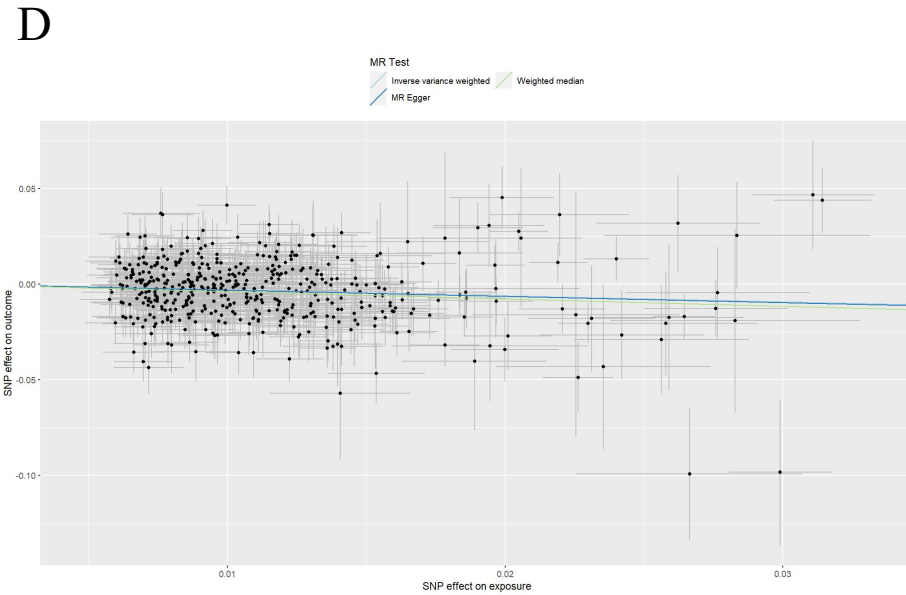

Figure S2. The scatter plot of SNPs associated with education attainment and their risk of musculoskeletal system diseases. A. Low back pain B. Spinal stenosis C. Rheumatoid arthritis D. Meniscus derangement

A

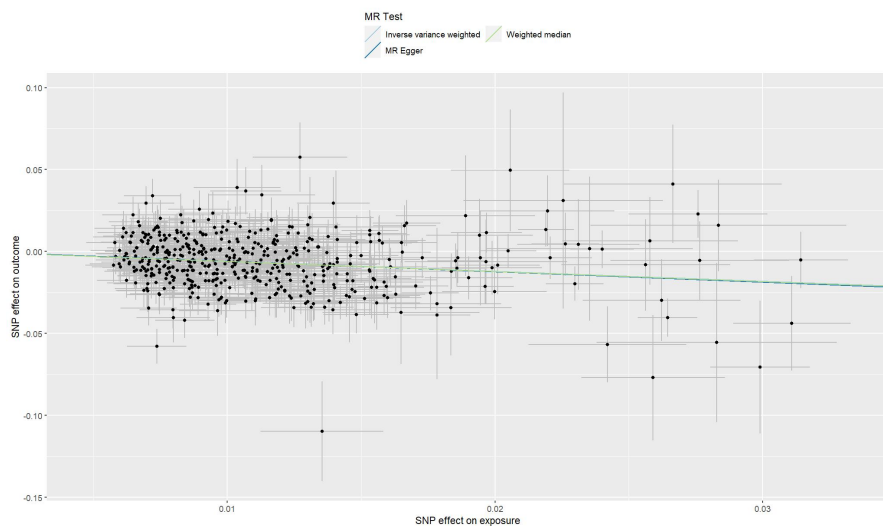

B

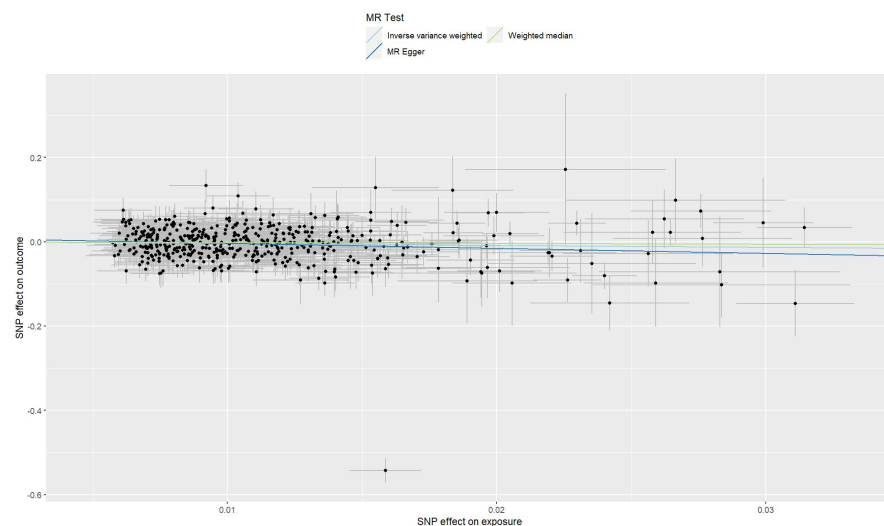

C

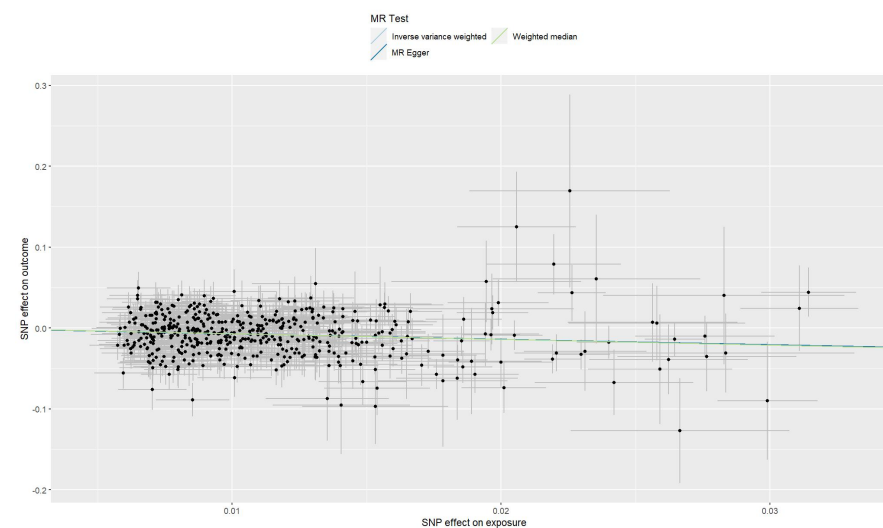

D

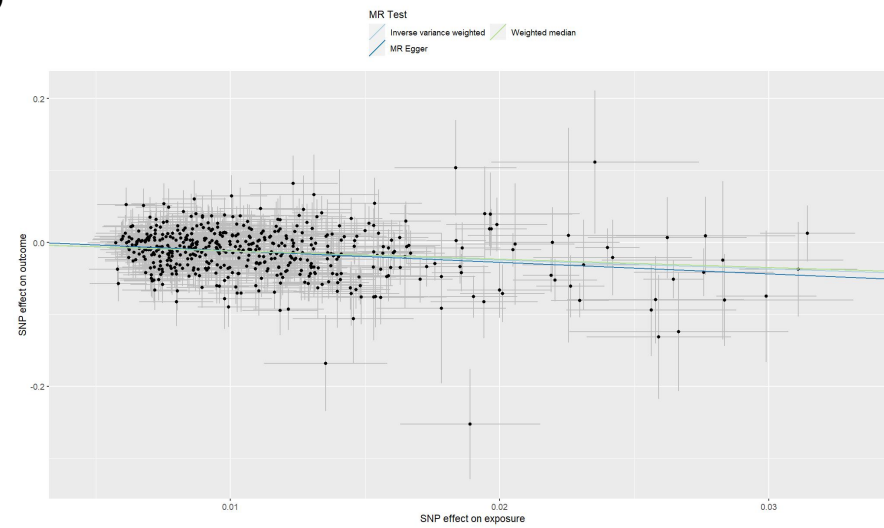

Figure S3. The scatter plot of SNPs associated with education attainment and their risk of musculoskeletal system diseases. A. Rotator cuff syndrome B. Ankylosing spondylitis, C. Cervicobrachial syndrome D. Lateral epicondylitis

A

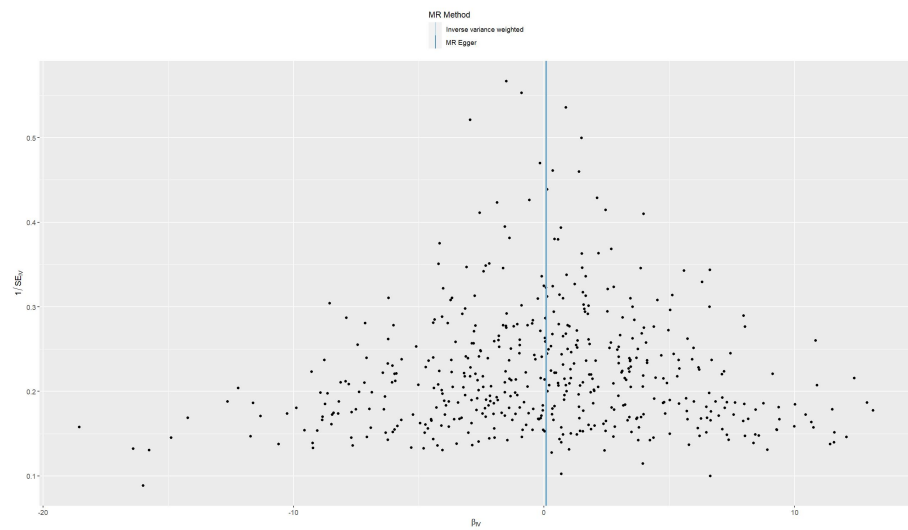

B

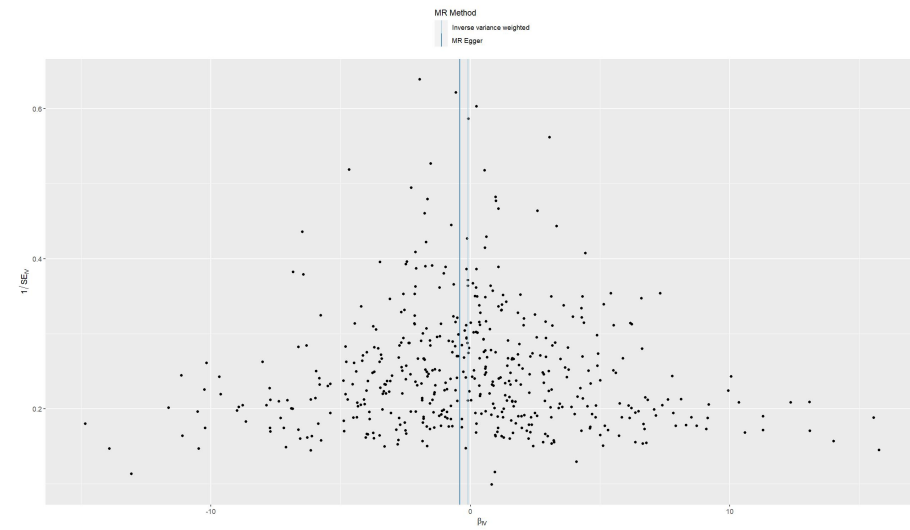

C

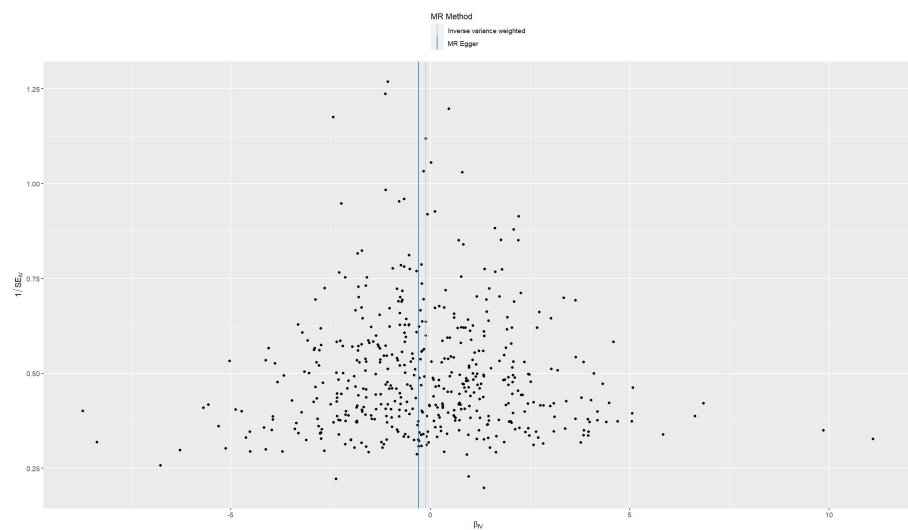

D

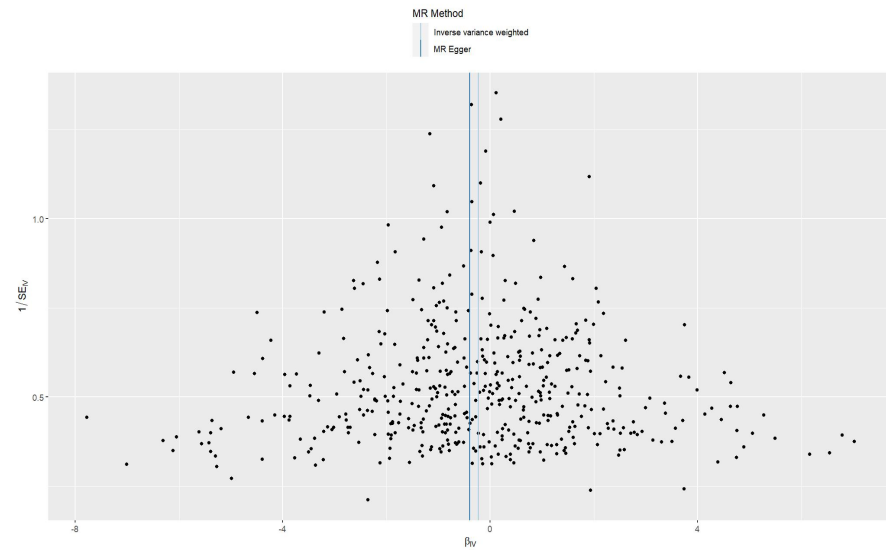

Figure S4. The funnel plot of SNPs associated with education attainment and their risk of musculoskeletal system diseases. A. Osteonecrosis B. Osteomyelitis C. Osteoporosis D. Gout

A

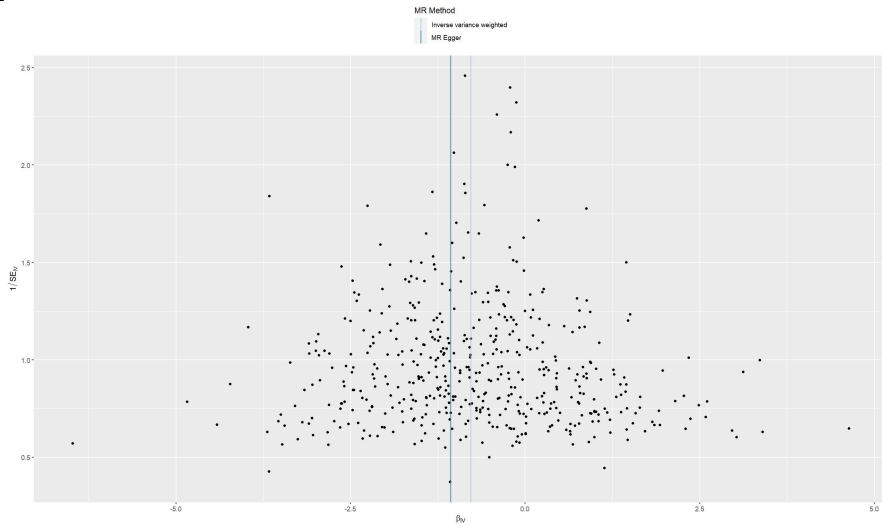

B

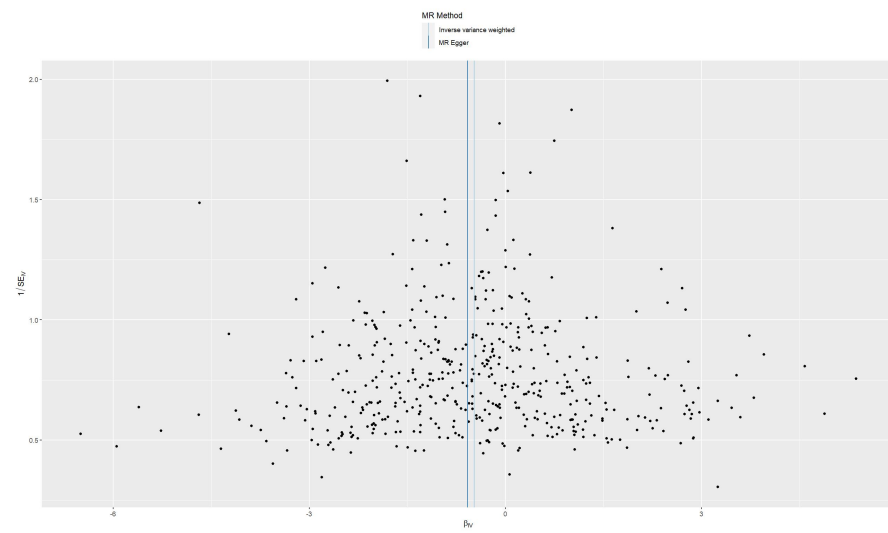

C

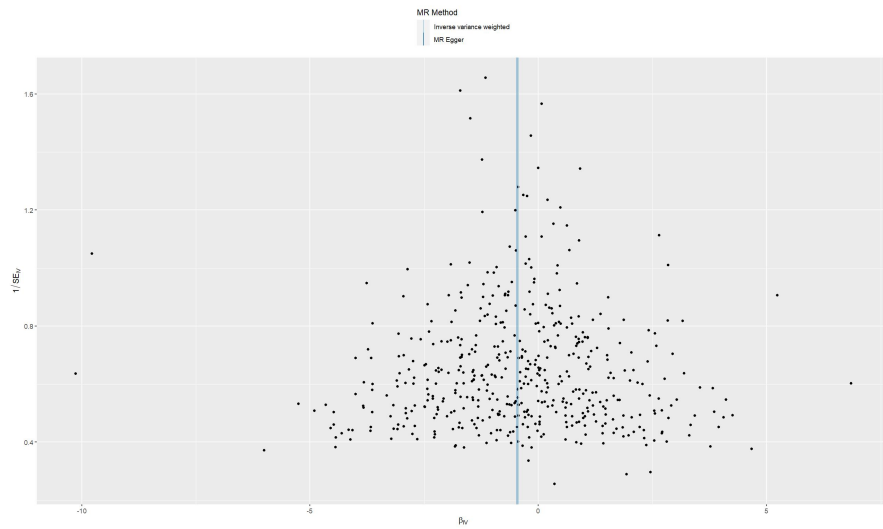

D

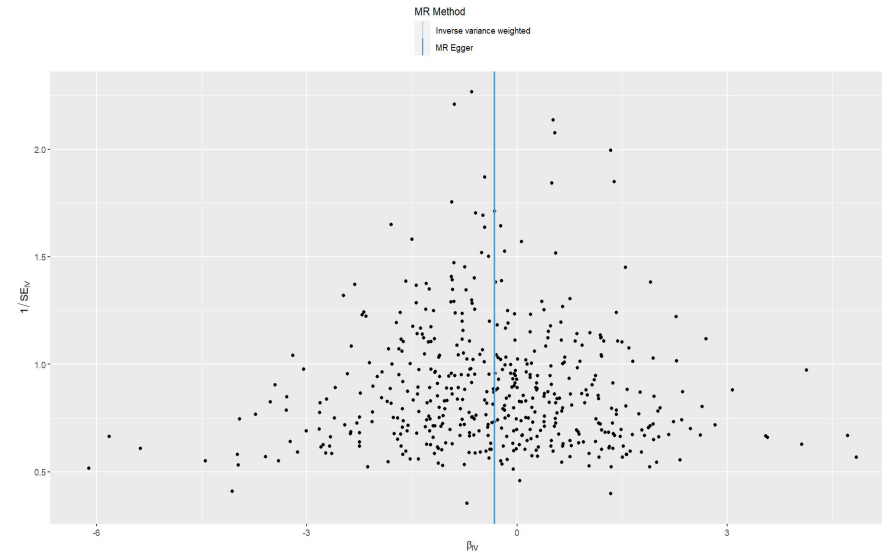

Figure S5. The funnel plot of SNPs associated with education attainment and their risk of musculoskeletal system diseases. A. Low back pain B. Spinal stenosis C. Rheumatoid arthritis D. Meniscus derangement

A

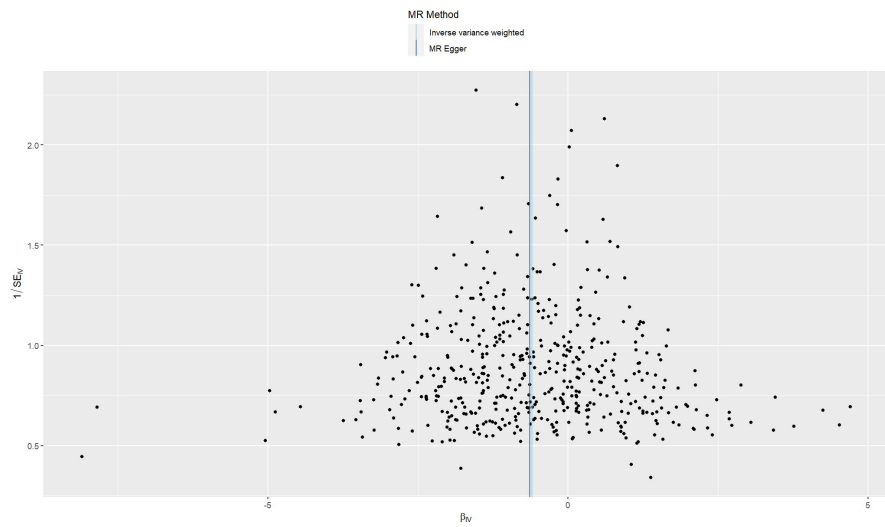

B

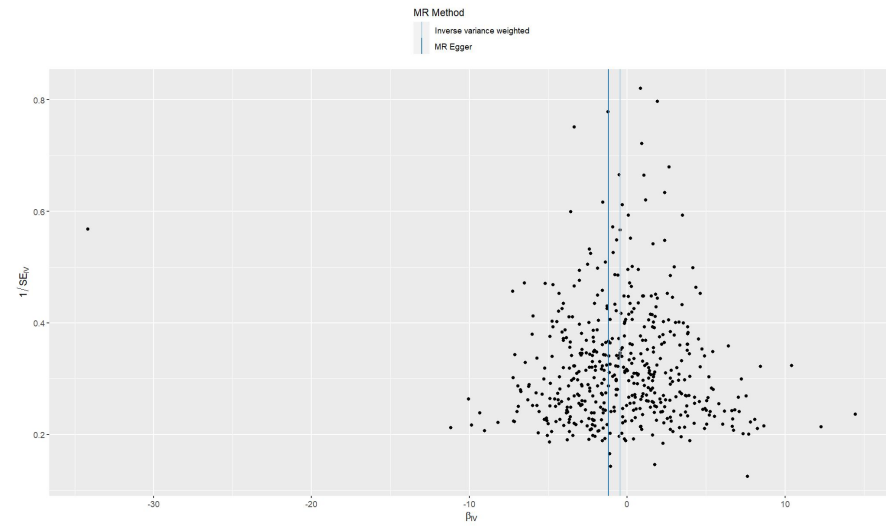

C

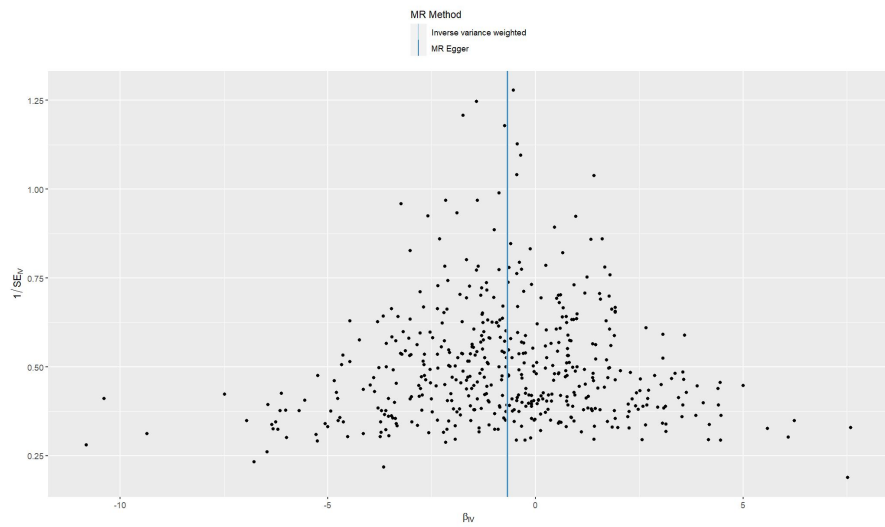

D

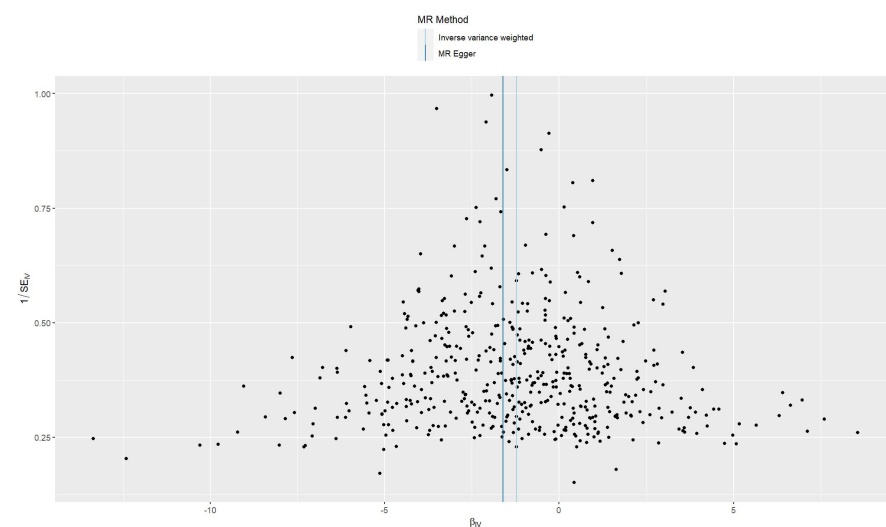

Figure S6. The funnel plot of SNPs associated with education attainment and their risk of musculoskeletal system diseases. A. Rotator cuff syndrome B. Ankylosing spondylitis, C. Cervicobrachial syndrome D. Lateral epicondylitis
